# Supplementary material for: Effect of phosphoric acid additive on the electrolyte of all-vanadium flow batteries
Source: Royal Society of Chemistry journal article supplement (doi:10.1039/d3cc06298h), 2024-01-01
Supplement: d3cc06298h1.pdf [file d3cc06298h1.pdf]

Electronic Supplementary Information (ESI)

## Effect of phosphoric acid additive on the electrolyte of all-vanadium flow batteries

Xuwen Wu,<sup>a,b</sup> Jingjing Liao,<sup>c\*</sup> Xingrong Yin,<sup>b</sup> Jun Liu,<sup>b,d</sup> Saixiang Wu,<sup>b</sup> Xiongwei Wu,<sup>b,d\*</sup> Zhiyong Xie<sup>a\*</sup>, Wei Ling<sup>d\*</sup>

<sup>a</sup>State Key Laboratory of Powder Metallurgy & Science and Technology on High Strength Structural Materials Laboratory, Central South University, Changsha 410083, China. E-mail: xzy507@csu.edu.cn.

<sup>b</sup>Hunan Province YinFeng New Energy Co., Ltd., Changsha 410000, China.

<sup>c</sup>School of Nuclear Science and Technology, University of South China, Hengyang 421001, China. E-mail: 2020000086@usc.edu.cn.

<sup>d</sup>School of Chemistry and Materials Science, Hunan Agricultural University, Changsha 410128, China. E-mail: wxwcsu05@aliyun.com, wling@hunau.edu.cn.

### Experiment

#### Preparation of the vanadium electrolyte

A tetravalent electrolyte with different concentrations of vanadium ions and sulfate ions and phosphoric acid was prepared using vanadium pentoxide as the raw material and oxalic acid as the reductant, and the redox reaction took place in a certain concentration of sulfuric acid solution. The concentrations of vanadium ions in the electrolyte were 1.0, 1.2, 1.4, 1.6, and 1.7 M, the concentrations of sulfate ions were 4.0, 4.25, and 4.5 M, and the concentrations of phosphoric acid were 0, 0.005, 0.1, and 0.15 M. Highly valent cathode electrolytes were prepared by electrolysis.

#### High temperature test

Take 8 ml of electrolyte in a plastic centrifuge tube, put it in a constant temperature water bath, set the temperature at 40, 45, 50, 55 °C, respectively, and the effects of the sulfuric acid concentration, charge state, and temperature on the cathode electrolyte were tested, respectively. The condition of the electrolyte was observed every 24h and recorded.

#### Electrochemical tests

The trivalent and tetravalent vanadium solutions prepared as described above were used as positive and negative electrolytes for charge/discharge cycling tests, and the migration of each substance in the electrolyte was examined.

- 1) Assembled the electrostacks with 650 ml of electrolyte with and without 0.1 M phosphoric acid;
- 2) The batteries were charged to 1.55 V using 8 A constant current, then 1.55 V constant voltage charging to a current of less than 6.25 A, and discharged at a constant power of 10 W to a voltage of 1 V, with 999 cycles of charging and discharging;
- 3) At the completion stage of discharging in different cycles, the samples were taken to test the electrolyte valence, vanadium concentration, sulfate concentration, phosphoric acid concentration, and record the volume of electrolyte.

**Table S1.** Effect of phosphoric acid concentration on high temperature stability of positive electrolyte.

| Phosphoric acid<br>concentration (mol L <sup>-1</sup> ) | SOC (%) /<br>Temperature (°C) | Precipitate<br>time /Days |
|---------------------------------------------------------|-------------------------------|---------------------------|
| 0                                                       | 85%/50                        | 1                         |
| 0.05                                                    | 85%/50                        | 3                         |
| 0.1                                                     | 85%/50                        | 6                         |
| 0.15                                                    | 85%/50                        | 2                         |

**Table S2.** Effects of different concentrations of vanadium ions on high temperature stability of positive electrolyte.

| Number of samples | Vanadium concentration (mol L <sup>-1</sup> ) | Temperature (°C) | Precipitate time (Days) |
|-------------------|-----------------------------------------------|------------------|-------------------------|
| 2-1               | 1.2                                           | 50               | >30                     |
| 2-2               | 1.4                                           | 50               | 17                      |
| 2-3               | 1.6                                           | 50               | 6                       |
| 2-4               | 1.7                                           | 50               | 2                       |

**Table S3.** Influence of sulfate ion concentration, SOC, and temperature on stability of positive electrolyte.

| Number of samples | Vanadium concentration (mol L <sup>-1</sup> ) | Sulfate concentration (mol L <sup>-1</sup> ) | SOC % | Precipitate time (Days) at different temperatures |       |       |       |
|-------------------|-----------------------------------------------|----------------------------------------------|-------|---------------------------------------------------|-------|-------|-------|
|                   |                                               |                                              |       | 40 °C                                             | 45 °C | 50 °C | 55 °C |
| 3-1               | 1.6                                           | 4.5                                          | 85    | 30                                                | 30    | 15    | 5     |
| 3-2               | 1.6                                           | 4.5                                          | 80    | 30                                                | 30    | 20    | 9     |
| 3-3               | 1.6                                           | 4.5                                          | 70    | 30                                                | 30    | 30    | 30    |
| 3-4               | 1.6                                           | 4.5                                          | 60    | 30                                                | 30    | 30    | 30    |
| 3-5               | 1.6                                           | 4.25                                         | 85    | 30                                                | 30    | 10    | 3     |
| 3-6               | 1.6                                           | 4.25                                         | 80    | 30                                                | 30    | 17    | 6     |
| 3-7               | 1.6                                           | 4.25                                         | 70    | 30                                                | 30    | 30    | 21    |
| 3-8               | 1.6                                           | 4.25                                         | 60    | 30                                                | 30    | 30    | 30    |
| 3-9               | 1.6                                           | 4                                            | 85    | 30                                                | 17    | 6     | 2     |
| 3-10              | 1.6                                           | 4                                            | 80    | 30                                                | 25    | 12    | 3     |
| 3-11              | 1.6                                           | 4                                            | 70    | 30                                                | 25    | 25    | 17    |
| 3-12              | 1.6                                           | 4                                            | 60    | 30                                                | 30    | 30    | 30    |

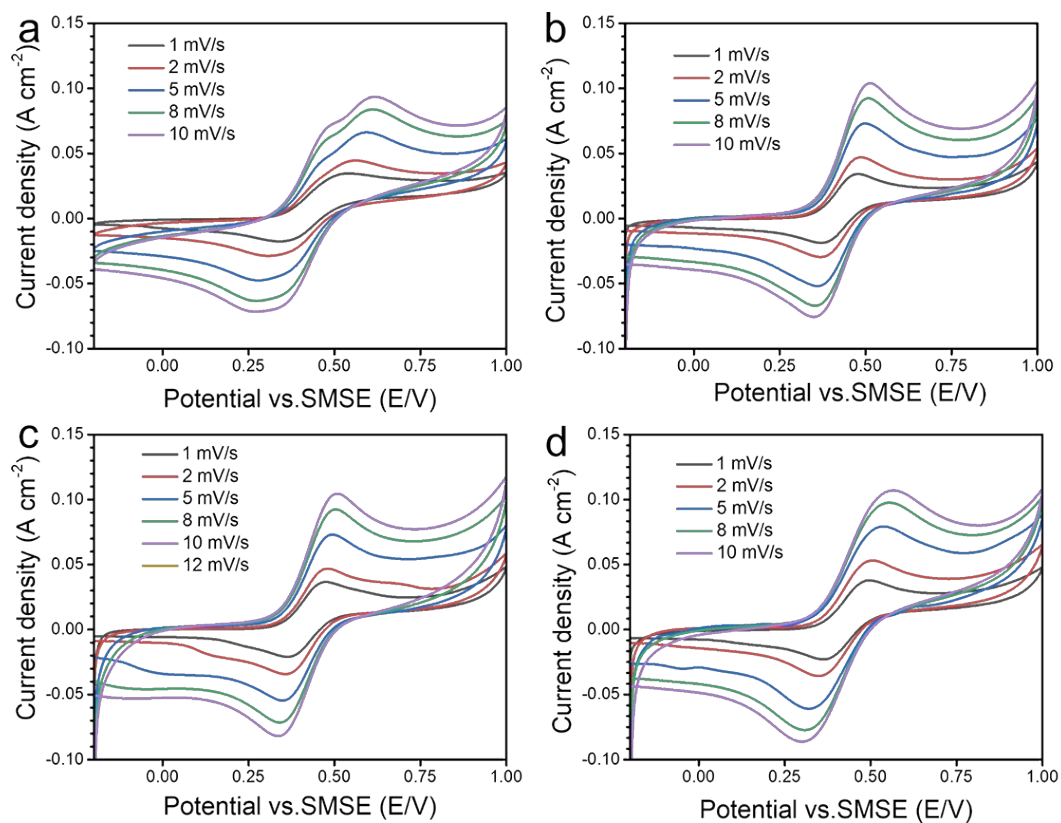

**Figure S1.** CV curves at different scan rates for  $\text{VO}_2^+/\text{VO}_2^+$  with 0.1 M  $\text{VOSO}_4$  in (a) 3 M  $\text{H}_2\text{SO}_4$ , (b) 3 M  $\text{H}_2\text{SO}_4$  + 50 ppm  $\text{Al}^{3+}$ , (c) 0.1 M  $\text{H}_3\text{PO}_4$  + 3 M  $\text{H}_2\text{SO}_4$ , (d) 0.1 M  $\text{H}_3\text{PO}_4$  + 3 M  $\text{H}_2\text{SO}_4$  + 50 ppm  $\text{Al}^{3+}$  solutions.

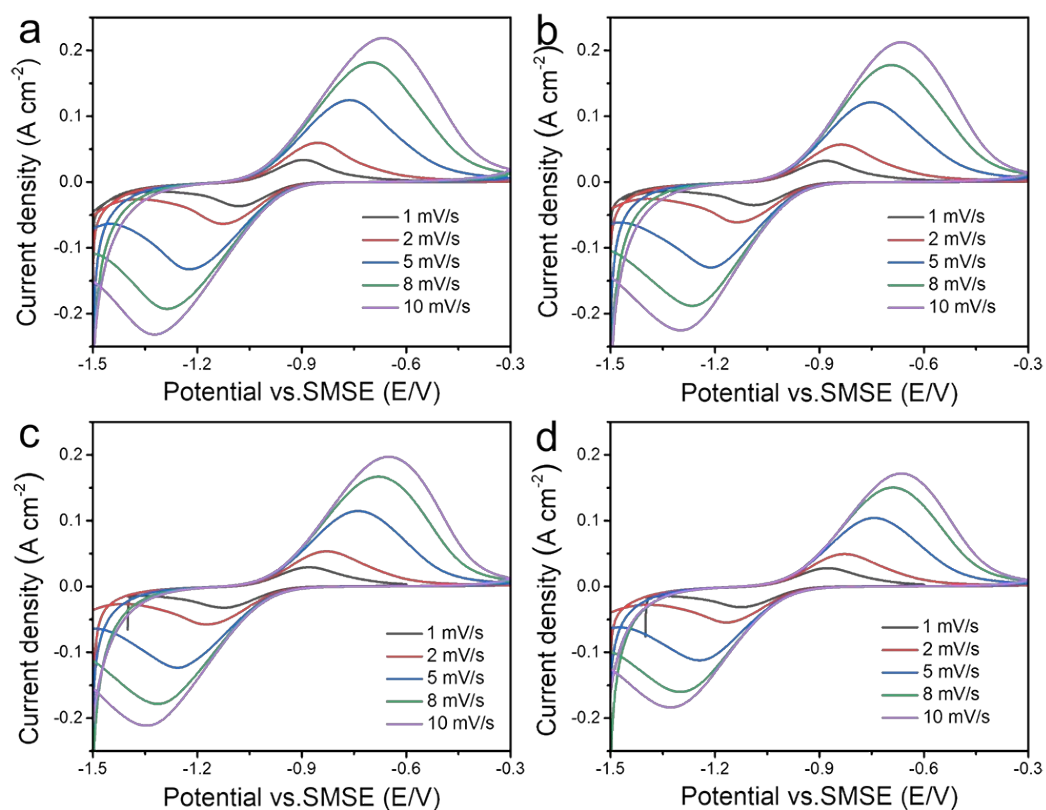

**Figure S2.** CV curves at different scan rates for V<sup>2+</sup>/V<sup>3+</sup> with 0.05 M V<sub>2</sub>(SO<sub>4</sub>)<sub>3</sub>, in (a) 3 M H<sub>2</sub>SO<sub>4</sub>, (b) 3 M H<sub>2</sub>SO<sub>4</sub>+50ppm Al<sup>3+</sup>, (c) 0.1 M H<sub>3</sub>PO<sub>4</sub> and 3 M H<sub>2</sub>SO<sub>4</sub>, (d) 0.1 M H<sub>3</sub>PO<sub>4</sub>+ 3 M H<sub>2</sub>SO<sub>4</sub> +50ppm Al<sup>3+</sup> solutions.
